# Supplementary material for: Dpp Signaling Activity Requires Pentagone to Scale with Tissue Size in the Growing Drosophila Wing Imaginal Disc
Source: PubMed Central journal article supplement (PMC3201923; doi:10.1371/journal.pbio.1001182), 2011-10-25

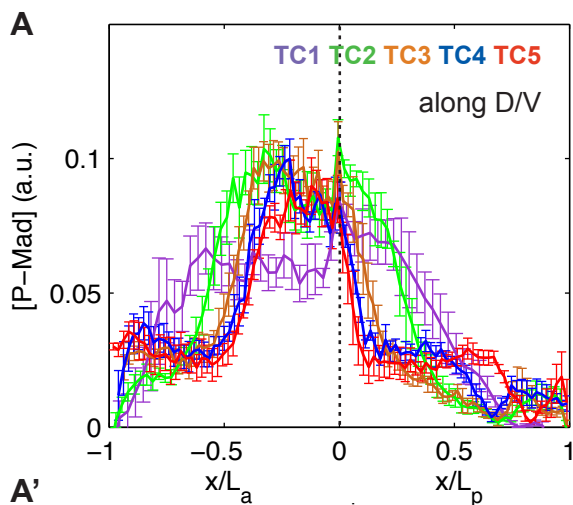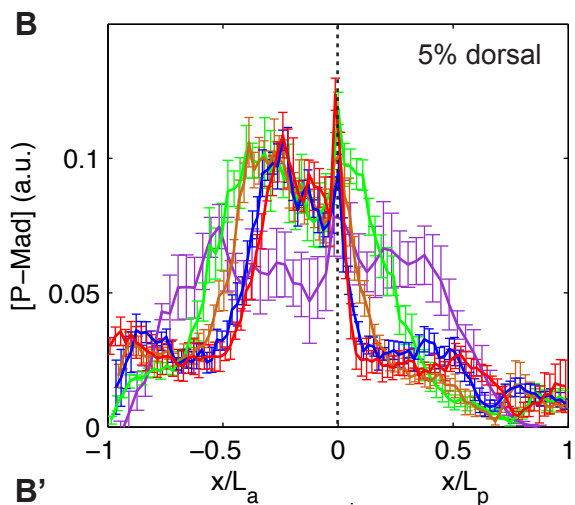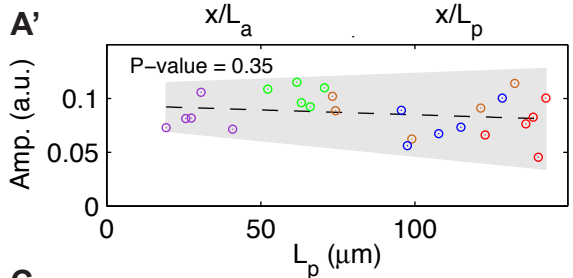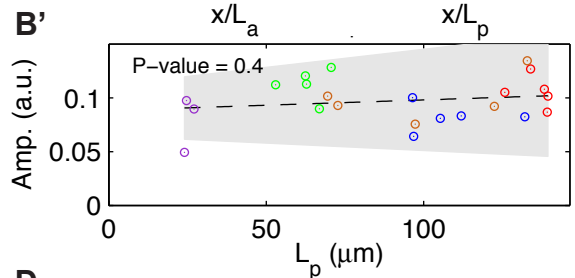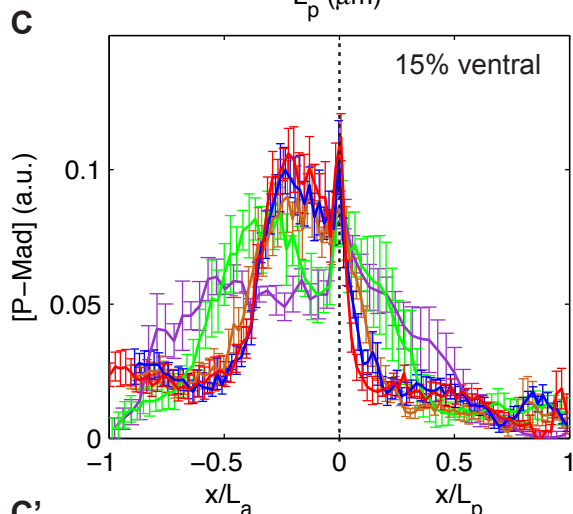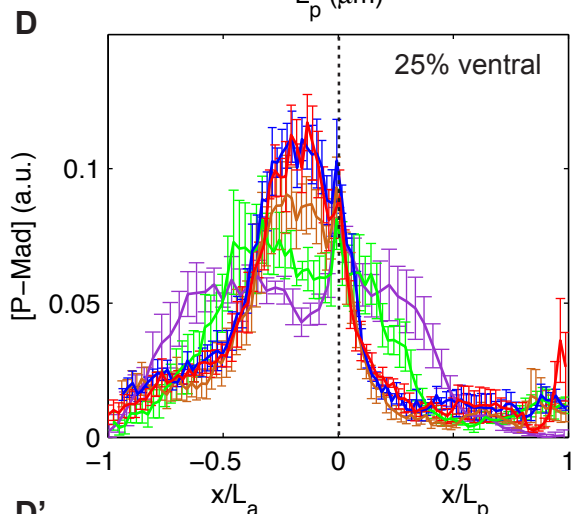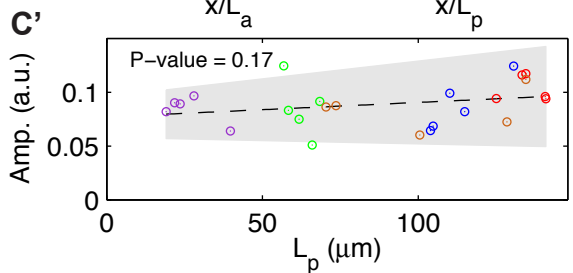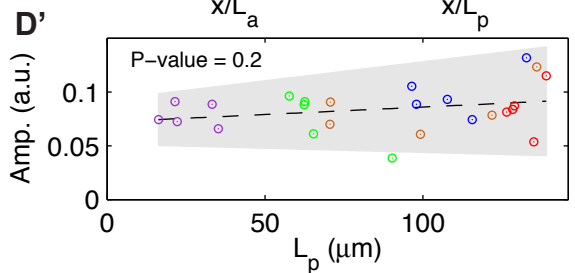

Supplement: pbio.1001182.s009.pdf [file pbio.1001182.s009.pdf]
