# Supplementary material for: Dpp Signaling Activity Requires Pentagone to Scale with Tissue Size in the Growing Drosophila Wing Imaginal Disc
Source: PLOS journal article supplement (doi:10.1371/journal.pbio.1001182), 2011-10-25

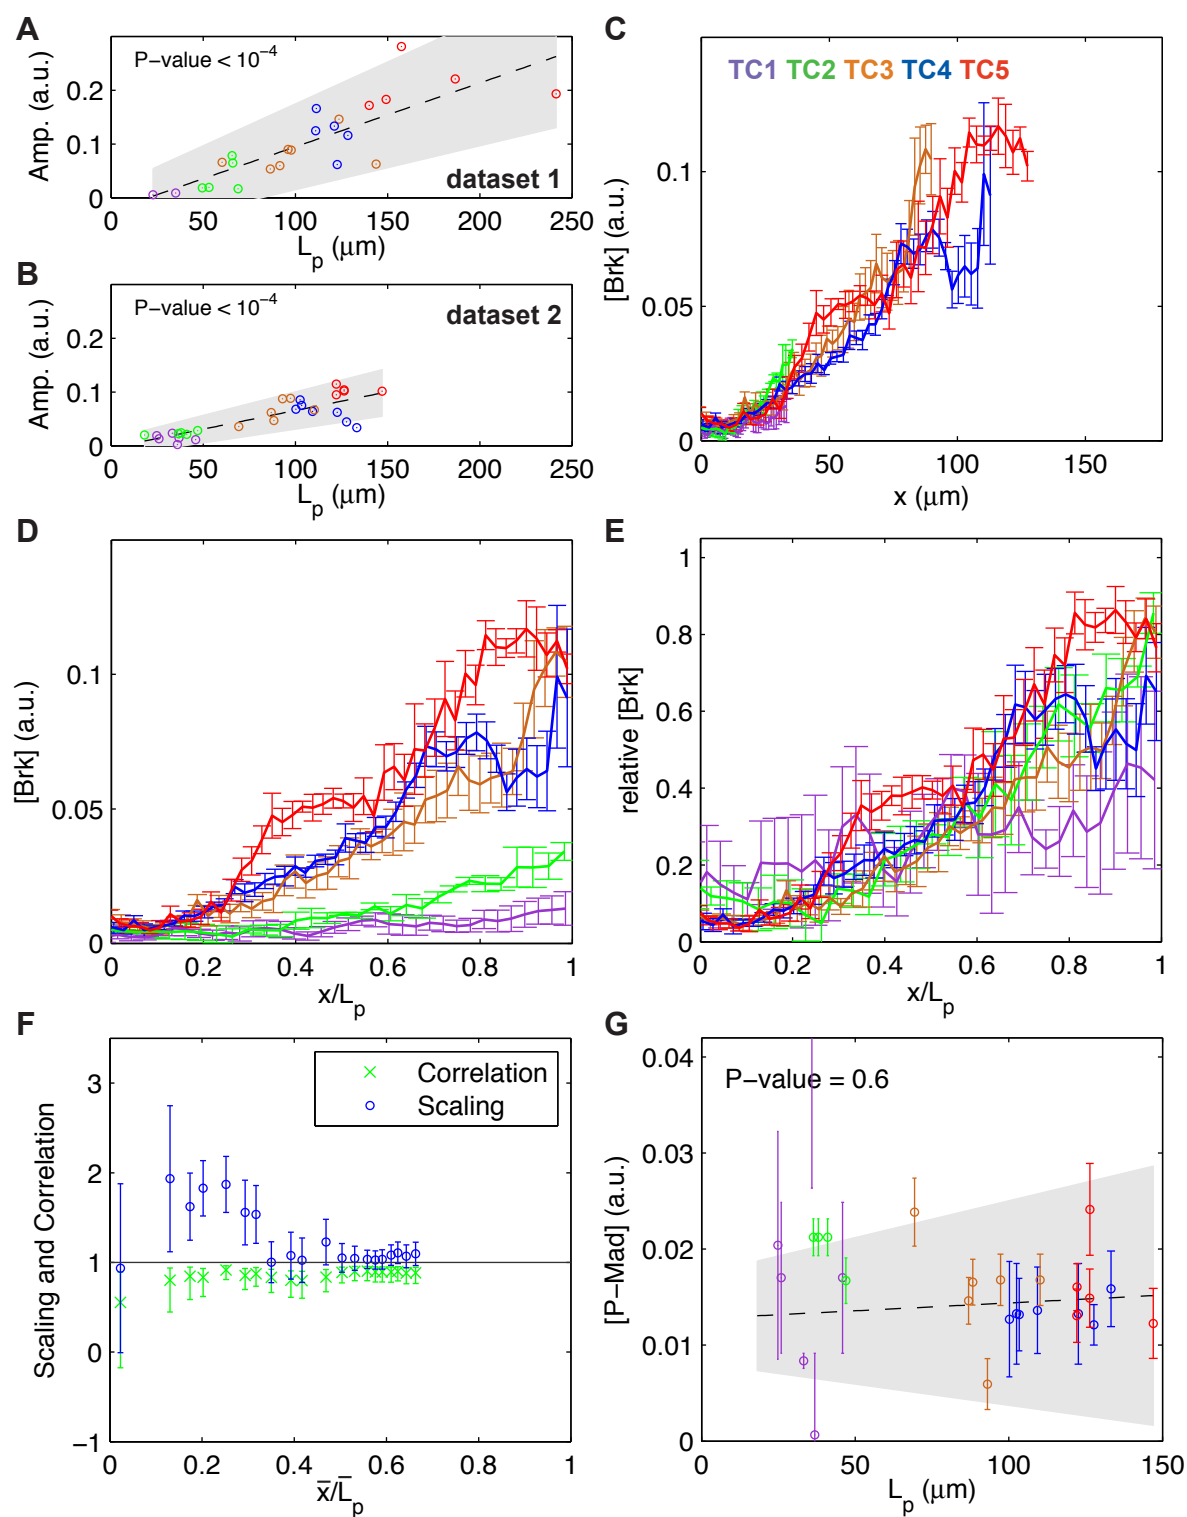

Supplement: S5 (10.1371/journal.pbio.1001182.s005) [file journal.pbio.1001182.s005]
